# Supplementary material
Source: PubMed Central journal article supplement (PMC7577113)
Supplement: ehp6635.s001.acco.pdf [file ehp6635.s001.acco.pdf]

**Note to readers with disabilities:** *EHP* strives to ensure that all journal content is accessible to all readers. However, some figures and Supplemental Material published in *EHP* articles may not conform to [508 standards](#) due to the complexity of the information being presented. If you need assistance accessing journal content, please contact [ehp508@niehs.nih.gov](mailto:ehp508@niehs.nih.gov). Our staff will work with you to assess and meet your accessibility needs within 3 working days.

### **Supplemental Material**

#### **The ‘SElection End points in Communities of bacTeria’ (SELECT) Method: A Novel Experimental Assay to Facilitate Risk Assessment of Selection for Antimicrobial Resistance in the Environment**

Aimee K. Murray, Isobel C. Stanton, Jessica Wright, Lihong Zhang, Jason Snape, and William H. Gaze

#### **Table of Contents**

**Table S1.** All primers and gBlocks used in this study for targeting 16S rRNA, *CTX-M* group, *ermF*, *qnrS* and *intI1* genes.

**Figure S1.** Risk Quotients (RQs) = lowest determined SELECT predicted no effect concentration for resistance ( $PNEC^R$ )/maximum measured environmental concentration ( $MEC_{max}$ ) or median measured environmental concentration ( $MEC_{med}$ ).  $MEC_{med}$  values include the non-detects. Measured environmental concentrations were extracted for all antibiotics except gentamicin from the UmweltBundesamt (2019) pharmaceuticals in the environment database. For gentamicin, predicted environmental concentration data were used. Risk was broadly classified in a traffic light colour system. Red, bold triangle = High risk ( $RQ > 1$ ), using  $MEC_{max}$ ; red, empty triangle = high risk ( $RQ > 1$ ), using  $MEC_{med}$ ; orange, bold square = medium risk ( $RQ > 0.1$  and  $< 1$ ), using  $MEC_{max}$ ; green, bold circle = low risk ( $RQ < 0.1$ ), using  $MEC_{max}$ ; green, empty circle = low risk ( $RQ < 0.1$ ), using  $MEC_{med}$ . Exact RQ values are reported.

**Figure S2.** Predicted no effect concentrations for resistance ( $PNEC^R$ , logged) determined using the SELECT (blue triangle) and qPCR methods (pink circle). Error bars represent the test concentrations directly above and directly below the NOECs used to calculate the  $PNEC^R$ s. All SELECT  $PNEC^R$ s were determined by taking the no observed effect concentrations and applying an assessment factor of 10. For all qPCR  $PNEC^R$ s, the *intI1* gene target is presented. QPCR  $PNEC^R$ s for azithromycin, clarithromycin, erythromycin and ciprofloxacin were taken from Stanton *et al.* (2020).

**Figure S3.** Bland-Altman analysis to compare the SELECT and qPCR-derived  $PNEC^R$ s. QPCR  $PNEC^R$ s for azithromycin, clarithromycin, erythromycin and ciprofloxacin were taken from Stanton *et al.* (2020).

**Figure S4.** SELECT predicted no effect concentrations for resistance ( $PNEC^R$ s, logged) were determined for four antibiotics, using wastewater samples from two different time points (2016 and 2018), two different wastewater treatment plants (WWTPs 'A' serving circa. 43,000, and 'B' serving circa. 77,000) and two different wastewater types (influent and effluent). Bars represent the test concentrations directly above and below the no observed effect concentrations used to determine the  $PNEC^R$ .

**Figure S5.** Logged SELECT predicted no effect concentrations for resistance ( $PNEC^R$ s) were determined for four antibiotics using wastewater treatment plant (WWTP) A influent (2018) samples using Iso-sensitest broth or artificial sewage, at 20 °C or 37 °C. Bars represent the test concentrations directly above and below the no observed effect concentrations used to determine the  $PNEC^R$ .

## References

**Additional File-** Excel Document

Table S1. All primers and gBlocks used in this study for targeting 16S rRNA, *CTX-M* group, *ermF*, *qnrS* and *intI1* genes.

| Gene target        | Forward primer (5' to 3')              | Reverse primer (5' to 3')         | Product size (bp) | gBlock sequence and length (bp)                                                                                                                                                                                                                                                                                                                                                                    | References                                    |
|--------------------|----------------------------------------|-----------------------------------|-------------------|----------------------------------------------------------------------------------------------------------------------------------------------------------------------------------------------------------------------------------------------------------------------------------------------------------------------------------------------------------------------------------------------------|-----------------------------------------------|
| 16S rRNA           | CGGTGAAT<br>ACGTCYC<br>GG              | GGWTACC<br>TTGTTACG<br>ACT        | 142               | ACGGTGAATACGTTCCCG<br>GGCCTTGTACACACCGCC<br>CGTCACACCATGGGAGTG<br>GGTTGCAAAGAAGTAGG<br>TAGCTTAACCTTCGGGAG<br>GGCGCTTACCACTTTGTG<br>ATTCATGACTGGGGTGAA<br>GTCGTAACAAGGTAACCG<br>- 144                                                                                                                                                                                                               | (Suzuki et al. 2000)<br>(Murray et al. 2018)  |
| <i>CTX-M</i> group | ATGTGCAG<br>YACCAGTA<br>ARGTKATG<br>GC | ATCACKC<br>GGRTCG<br>CCXGGR<br>AT | ~300              | GATGTGCAGCACCAGTAA<br>AGTGATGGCCGCGGCCG<br>CGGTGCTGAAGAAAAGTG<br>AAAGCGAACCGAATCTGT<br>TAAATCAGCGAGTTGAGA<br>TCAAAAAATCTGACCTTGT<br>TAACTATAATCCGATTGCG<br>GAAAAGCACGTCAATGGG<br>ACGATGTCAGTGGCTGAG<br>CTTAGCGCGCCGCGCT<br>ACAGTACAGCGATAACGT<br>GGCGATGAATAAGCTGAT<br>TGCTCACGTTGGCGCC<br>CGGCTAGCGTCACCGCG<br>TTCGCCCCGACAGCTGGG<br>AGACGAAACGTTCCGTC<br>TCGACCGTACCGAGCCG<br>ACGTTAAACACCGCCATT | (Birkett et al. 2007)<br>(Murray et al. 2018) |

|             |                               |                                 |  |                                                                                                                                                                                                                                                                                                                                                                                          |                                                                |
|-------------|-------------------------------|---------------------------------|--|------------------------------------------------------------------------------------------------------------------------------------------------------------------------------------------------------------------------------------------------------------------------------------------------------------------------------------------------------------------------------------------|----------------------------------------------------------------|
|             |                               |                                 |  | CCGGGCGATCCGCGTGA<br>TA - 338                                                                                                                                                                                                                                                                                                                                                            |                                                                |
| <i>ermF</i> | TCTGGGAG<br>GTTCCATT<br>GTCCT | ACTTTCAG<br>GACCTAC<br>CTCATAGA |  | TCTGATGCCCGAAA<br>TGTTCAAGTTGTCC<br>GTTGTGATTTTAGG<br>AATTTTGCAGTTCC<br>GAATTTCTTTCAA<br>AGTGGTGTCAAATA<br>TTCTTATGGCATT<br>CTTCCGATATTTTC<br>AAAATCTGATGTTT<br>GAGAGTCTTGGAA<br>ATTTTCTGGGAGGT<br>TCCATTGTCCTTCA<br>ATTAGAACCTACAC<br>AAAAGTTATTTTCGA<br>GGAAGCTTTACAAT<br>CCATATACCGTTTT<br>CTATCATACTTTTT<br>TTGATTTGAACTT<br>GTCTATGAGGTAG<br>GTCCTGAAAGTTT<br>CTTGCCACCGCCA<br>-294 | (Stanton et al.<br>2020)                                       |
| <i>qnrS</i> | CGACGTGC<br>TAACTTGC<br>GTGA  | GGCATTGT<br>TGGAACT<br>TGCA     |  | TTCGACGTGCTAACT<br>TGCGTGATACGACAT<br>TCGTCAACTGCAAG<br>TTCATTGAACAGGGT<br>GATATCGAAGGCTG<br>CCACTTTGATGTCCG<br>CAGATCTTCGTGAT<br>GCAAGTTTCCAACA<br>ATGCCAACTT - 125                                                                                                                                                                                                                     | (Colomer-<br>Lluch et al.<br>2014)<br>(Stanton et al.<br>2020) |

|              |                              |                            |  |                                                                                                                                                                                                                                                                 |                                                      |
|--------------|------------------------------|----------------------------|--|-----------------------------------------------------------------------------------------------------------------------------------------------------------------------------------------------------------------------------------------------------------------|------------------------------------------------------|
| <i>intl1</i> | GCCTTGAT<br>GTTACCCG<br>AGAG | GATCGGT<br>CGAATGC<br>GTGT |  | GGCCTTGATGTTACCC<br>GAGAGCTTGGCACCC<br>AGCCTGCGCGAGCAG<br>CTGTGCGGTGCACGG<br>GCATGGTGGCTGAAG<br>GACCAGGCCGAGGG<br>CCGCAGCGGCGTTG<br>CGCTTCCCGACGCC<br>CTTGAGCGGAAGTA<br>TCCGCGCGCCGGG<br>CATTCTGGCCGTG<br>GTTCTGGGTTTTTG<br>CGCAGCACACGCA<br>TTCGACCGATCC - 198 | (Barraud et al.<br>2010)<br>(Stanton et al.<br>2020) |
|--------------|------------------------------|----------------------------|--|-----------------------------------------------------------------------------------------------------------------------------------------------------------------------------------------------------------------------------------------------------------------|------------------------------------------------------|

For Excel Tables S1, S2, S3 & S4 see attached excel sheet.

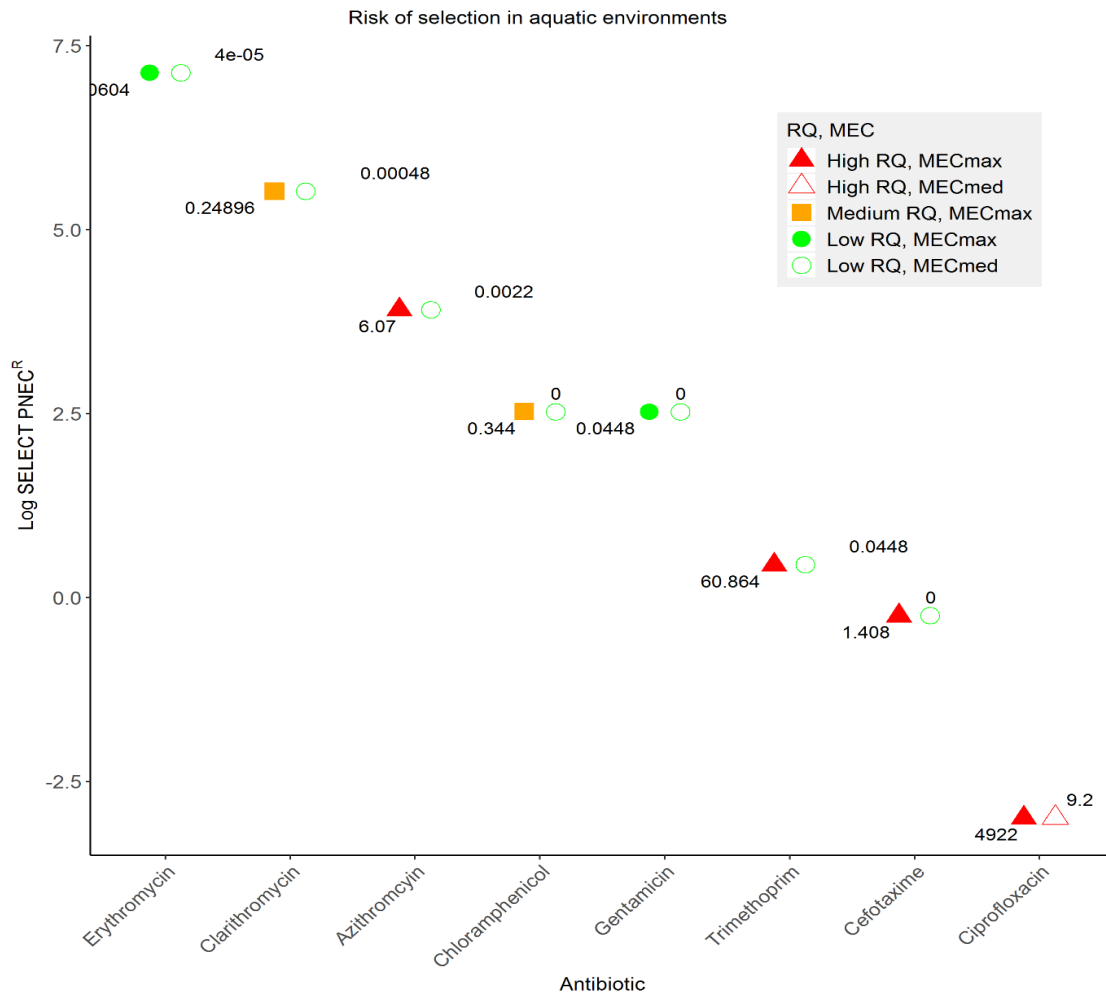

Figure S1. Risk Quotients (RQs) = lowest determined SELECT predicted no effect concentration for resistance ( $PNEC^R$ )/maximum measured environmental concentration ( $MEC_{max}$ ) or median measured environmental concentration ( $MEC_{med}$ ).  $MEC_{med}$  values include the non-detects. Measured environmental concentrations were extracted for all antibiotics except gentamicin from the UmweltBundesamt (2019) pharmaceuticals in the environment database. For gentamicin, predicted environmental concentration data were used. Risk was broadly classified in a traffic light colour system. Red, bold triangle = High risk ( $RQ > 1$ ), using  $MEC_{max}$ ; red, empty triangle = high risk ( $RQ > 1$ ), using  $MEC_{med}$ ; orange, bold square = medium risk ( $RQ > 0.1$  and  $< 1$ ), using  $MEC_{max}$ ; green, bold circle = low risk ( $RQ < 0.1$ ), using  $MEC_{max}$ ; green, empty circle = low risk ( $RQ < 0.1$ ), using  $MEC_{med}$ . Exact RQ values are reported.

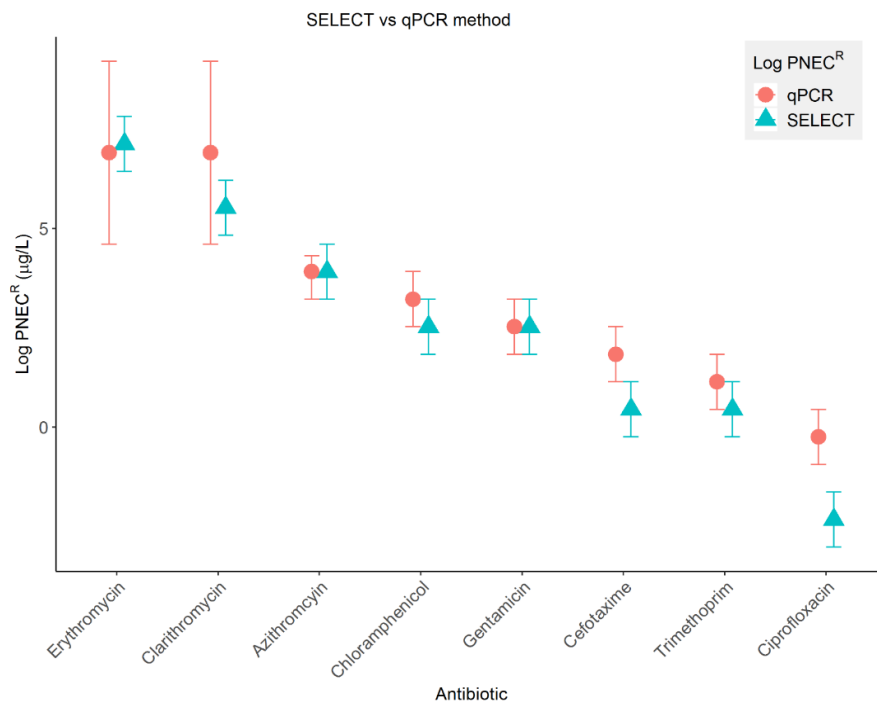

Figure S2. Predicted no effect concentrations for resistance (PNEC<sup>R</sup>s, logged) determined using the SELECT (blue triangle) and qPCR methods (pink circle). Error bars represent the test concentrations directly above and directly below the NOECs used to calculate the PNEC<sup>R</sup>s. All SELECT PNEC<sup>R</sup>s were determined by taking the no observed effect concentrations and applying an assessment factor of 10. For all qPCR PNEC<sup>R</sup>s, the *intI1* gene target is presented. QPCR PNEC<sup>R</sup>s for azithromycin, clarithromycin, erythromycin and ciprofloxacin were taken from Stanton *et al.* (2020).

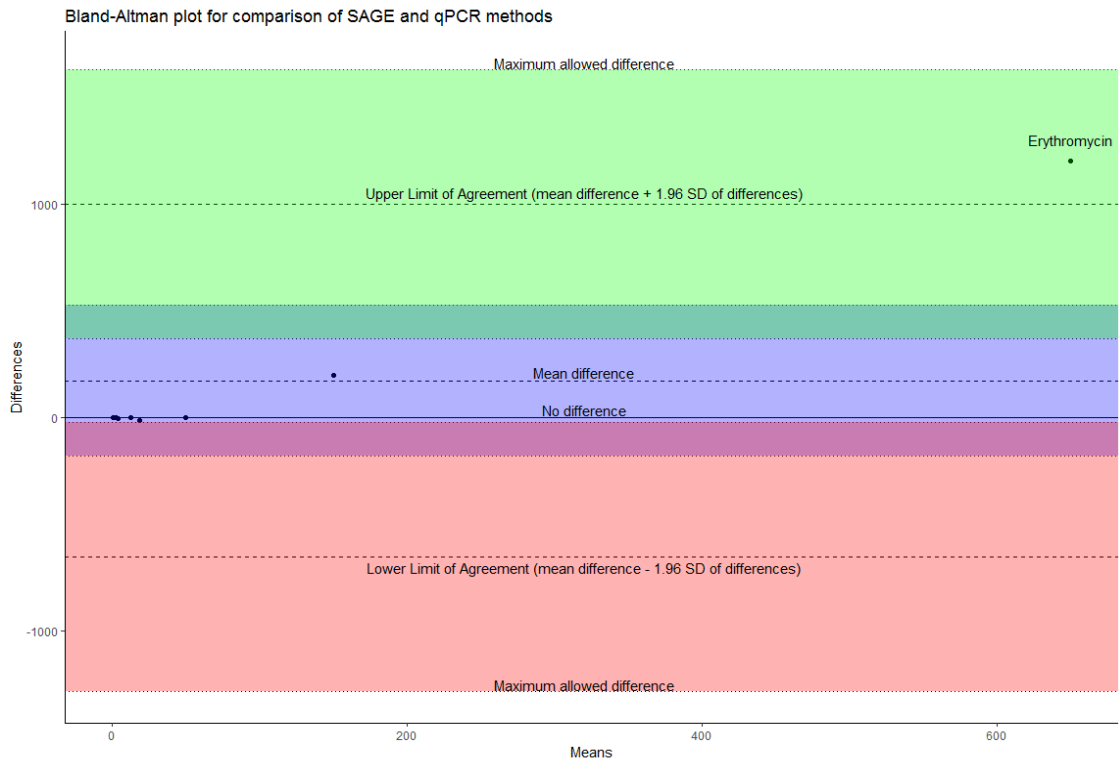

Figure S3. Bland-Altman analysis to compare the SELECT and qPCR-derived PNEC<sup>R</sup>s. QPCR PNEC<sup>R</sup>s for azithromycin, clarithromycin, erythromycin and ciprofloxacin were taken from Stanton *et al.* (2020).



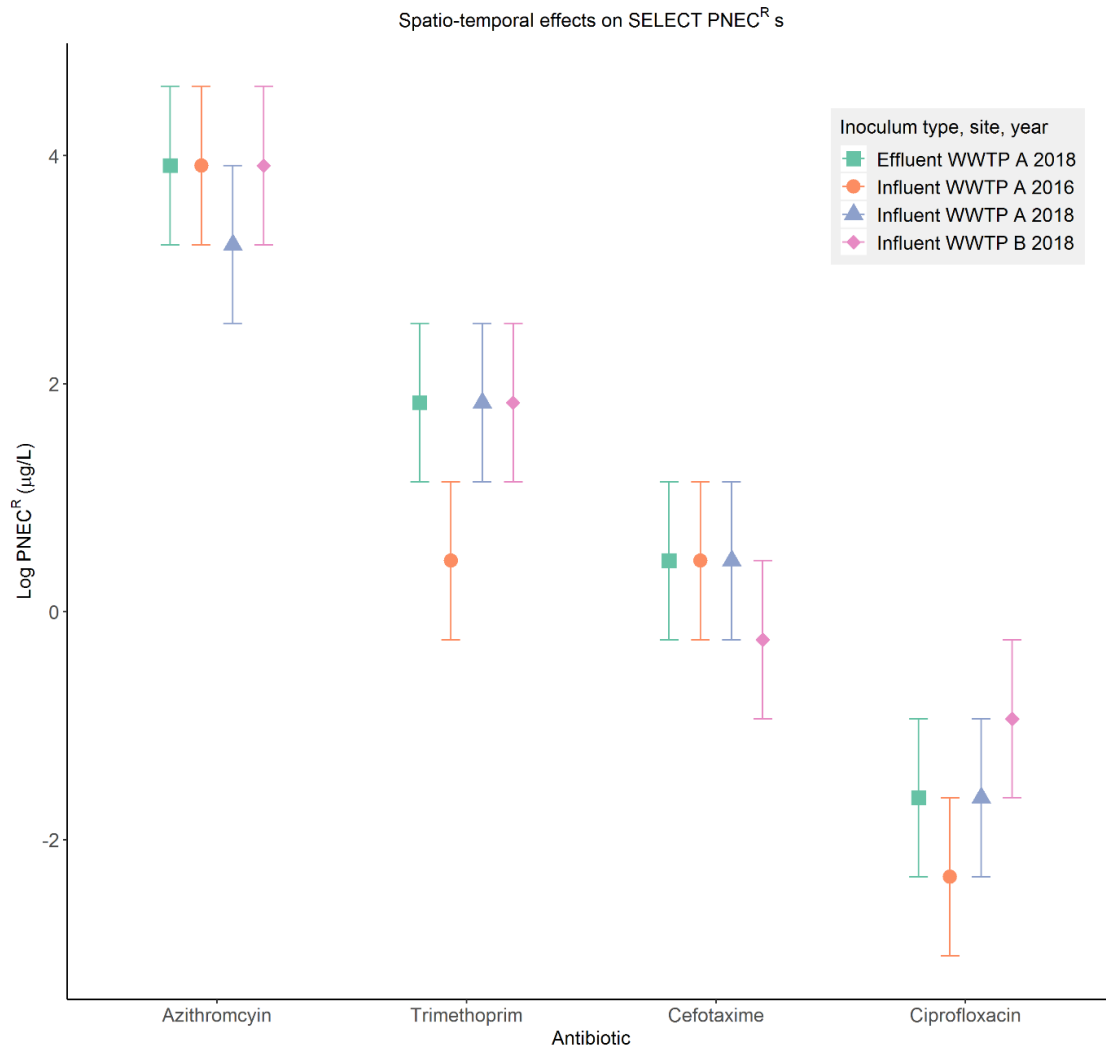

Figure S4. SELECT predicted no effect concentrations for resistance (PNEC<sup>R</sup>s, logged) were determined for four antibiotics, using wastewater samples from two different time points (2016 and 2018), two different wastewater treatment plants (WWTPs 'A' serving circa. 43,000, and 'B' serving circa. 77,000) and two different wastewater types (influent and effluent). Bars represent the test concentrations directly above and below the no observed effect concentrations used to determine the PNEC<sup>R</sup>.

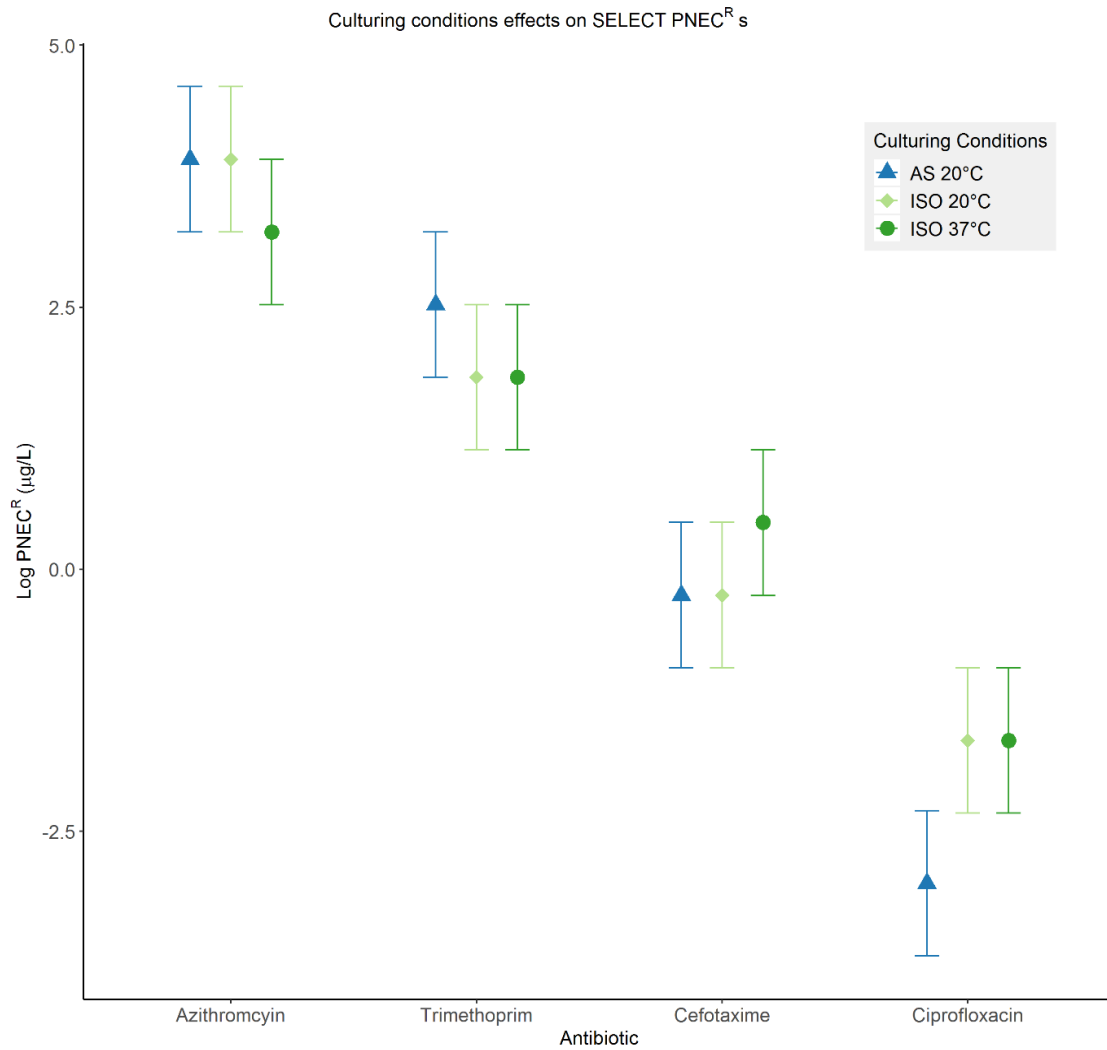

Figure S5. Logged SELECT predicted no effect concentrations for resistance (PNEC<sup>R</sup>s) were determined for four antibiotics using wastewater treatment plant (WWTP) A influent (2018) samples using Iso-sensitest broth or artificial sewage, at 20 °C or 37 °C. Bars represent the test concentrations directly above and below the no observed effect concentrations used to determine the PNEC<sup>R</sup>.

## References

- Barraud O, Baclet MC, Denis F, Ploy MC. 2010. Quantitative multiplex real-time pcr for detecting class 1, 2 and 3 integrons. *The Journal of antimicrobial chemotherapy* 65:1642-1645.
- Birkett CI, Ludlam HA, Woodford N, Brown DFJ, Brown NM, Roberts MTM, et al. 2007. Real-time taqman pcr for rapid detection and typing of genes encoding ctx-m extended-spectrum  $\beta$ -lactamases. *Journal of Medical Microbiology* 56:52-55.
- Colomer-Lluch M, Jofre J, Muniesa M. 2014. Quinolone resistance genes (qnra and qnrs) in bacteriophage particles from wastewater samples and the effect of inducing agents on packaged antibiotic resistance genes. *The Journal of antimicrobial chemotherapy* 69:1265-1274.
- Murray AK, Zhang L, Yin X, Zhang T, Buckling A, Snape J, et al. 2018. Novel insights into selection for antibiotic resistance in complex microbial communities. *mBio* 9.
- Stanton IC, Murray AK, Zhang L, Snape J, Gaze WH. 2020. Evolution of antibiotic resistance at low antibiotic concentrations: Selection below the minimal selective concentration. *Communications Biology*.
- Suzuki MT, Taylor LT, DeLong EF. 2000. Quantitative analysis of small-subunit rRNA genes in mixed microbial populations via 5'-nuclease assays. *Applied and Environmental Microbiology* 66:4605-4614.
- UmweltBundesamt. 2019. Pharmaceuticals in the environment. (UBA, ed).
